# Supplementary material for: Remarkable changes in the photoluminescent properties of Y2Ce2O7:Eu3+ red phosphors through modification of the cerium oxidation states and oxygen vacancy ordering
Source: Royal Society of Chemistry journal article supplement (doi:10.1039/c4cp03311f), 2014-01-01
Supplement: c4cp03311f1.pdf [file c4cp03311f1.pdf]

Supporting information (SI) for

**Remarkable changes in the photoluminescent properties of  $\text{Y}_2\text{Ce}_2\text{O}_7:\text{Eu}^{3+}$  red phosphors through the modification of cerium oxidation states and oxygen vacancy ordering**

Athira K.V. Raj, P. Prabhakar Rao\*, T. S. Sreena, S. Sameera, Vineetha James and U. A. Renju

*Materials Science and Technology Division, CSIR-National Institute for Interdisciplinary Science and Technology (NIIST), Trivandrum – 695 019, India*

**ESI. Calculation Procedure for Judd–Ofelt intensity parameters**

The Judd–Ofelt intensity parameters of the  $\text{Y}_2\text{Ce}_{2-x}\text{O}_7:x\text{Eu}^{3+}$  ( $x = 0, 0.05, 0.20, 0.25$ , and  $0.50$ ) are summarized in Table 3 of the manuscript and is calculated from the luminescence emission spectrum. The integrated emission intensities (areas below the luminescence bands) are associated with the radiative emission rates and can be written as:

$$\frac{A_{0-2,4}}{A_{0-1}} = \frac{I_{0-2,4} h\nu_{0-1}}{I_{0-1} h\nu_{0-2,4}}$$

(1)

where  $I_{0-J}$  is the integrated emission intensity and  $h\nu_{0-J}$  is the energy corresponding to transition  $^5\text{D}_0 \rightarrow ^7\text{F}_J$  ( $J = 1, 2, 4$ ). The transition  $^5\text{D}_0 \rightarrow ^7\text{F}_J$  is left out due to their small emission intensities. The magnetic dipole radiative emission rate  $A_{0-1}$  has a value of  $\approx 50 \text{ s}^{-1}$ . The radiative emission rates  $A_{0-2,4}$  are related to forced electric dipole transitions and they may be written as a function of the J–O intensity parameters:

$$A_{0-J} = \frac{64\pi^4(\nu_{0-2,4})^3 e^2}{3hc^3} \frac{1}{4\pi\epsilon_0} \chi \sum_{j=2,4,6} \Omega_j \langle 5D_0 | U^{(j)} | 7F_{2,4} \rangle^2 \quad (2)$$

where,  $\chi$  is the Lorentz local field correction factor given as function of the index of refraction  $n$  of the host  $\chi = n(n^2 + 2)^{2/9}$ . The non-zero square reduced matrix elements are solely  $\langle 5D_0 | U^{(2)} | 7F_2 \rangle^2 = 0.0032$  and  $\langle 5D_0 | U^{(4)} | 7F_4 \rangle^2 = 0.0023$ . Thus, using Eqs. (1) and (2) the values of  $\Omega_{2,4}$  were obtained. The value of  $\Omega_6$  could also be estimated by analysing the  $^5D_0 \rightarrow ^7F_6$  transition but in the present case, this emission could not be observed. The calculated Judd–Ofelt parameters have been used to predict some important radiative properties such as transition probabilities, radiative lifetime and branching ratios and lifetimes for the excited states of  $\text{Eu}^{3+}$  ions. The radiative transition probability for a transition  $\Psi J \rightarrow \Psi' J'$  can be calculated from Eq. (3) as  $A_{rad}(\Psi J, \Psi' J') = A_{J-J'}$ .

The total radiative transition probability ( $A_T$ ) can be calculated using the equation below:

$$A_T(\Psi J) = \sum_{J'} A_{J-J'} \quad (3)$$

The radiative lifetime  $\tau_{rad}(\Psi J)$  of an excited state in terms of  $A_T$ , is given by:

$$\tau_{rad}(\Psi J) = \frac{1}{A_T(\Psi J)} \quad (4)$$

The branching ratio  $\beta(\Psi J)$  corresponding to the emission from an excited level to its lower levels is given by:

$$\beta(\Psi J) = \frac{A(\Psi J, \Psi' J')}{A_T(\Psi J)} \quad (5)$$

The stimulated emission cross-section ( $\sigma(\lambda_p)$ ) can be expressed as:

$$(\sigma(\lambda_p))(J \rightarrow J') = \frac{\lambda_p^4}{8\pi c n^2 \Delta\lambda_{eff}} A_{rad}(J \rightarrow J') \quad (6)$$

where  $\lambda_p$  is the peak wavelength and  $\Delta\lambda_{eff}$  is its effective line width found by dividing the area of the emission band by its maximum height.

### ESI. Calculation Procedure for Quantum Efficiency

Assuming that only radiative and non radiative processes are essentially involved in the depopulation of  $^5D_0$  states of  $Eu^{3+}$  ion, the quantum efficiency ( $\eta$ ) can be expressed as;

$$\eta = A_{rad} / (A_{rad} + A_{nrad}) \quad (7)$$

where  $A_{rad}$  and  $A_{nrad}$  are radiative and non radiative transition probabilities respectively

### Figure Captions

**Fig. S1.** Powder XRD patterns of  $Y_2Ce_{1-x}O_7:xEu^{3+}$  ( $x = 0.05, 0.10, 0.15, 0.20, 0.25, 0.50$ ) red phosphors. The XRD patterns can be indexed completely to the C-type structure.

**Fig. S2.** XPS spectra of Ce 3d for  $Y_2Ce_{1.5}O_7:0.5Eu^{3+}$  red phosphor and the concentration of  $Ce^{3+}$  state is decreased compared to the lower substituted one ( $x = 0.10$ ) and is found to be 11.5%.

**Fig. S3.** Selected area electron diffraction patterns (SEAD) and TEM micrographs (a)  $Y_2Ce_{1.8}O_7:0.2Eu^{3+}$  and (b)  $Y_2Ce_{1.5}O_7:0.5Eu^{3+}$  red phosphors.

**Fig. S4.** Energy dispersive spectrometer (EDS) spectra of (a)  $\text{Y}_2\text{Ce}_{1.8}\text{O}_7:0.2\text{Eu}^{3+}$  and (b)  $\text{Y}_2\text{Ce}_{1.5}\text{O}_7:0.5\text{Eu}^{3+}$  red phosphors.

**Fig. S5.** Typical SEM images of  $\text{Y}_2\text{Ce}_{2-x}\text{O}_7:x\text{Eu}^{3+}$  ( $x = 0.05, 0.10, 0.15, 0.20, 0.25$  and  $0.50$ ) red phosphors. The particles are slightly agglomerated and there is a broad distribution of particle size with an average size of  $1\text{-}3\text{ }\mu\text{m}$ .

**Fig. S1.**

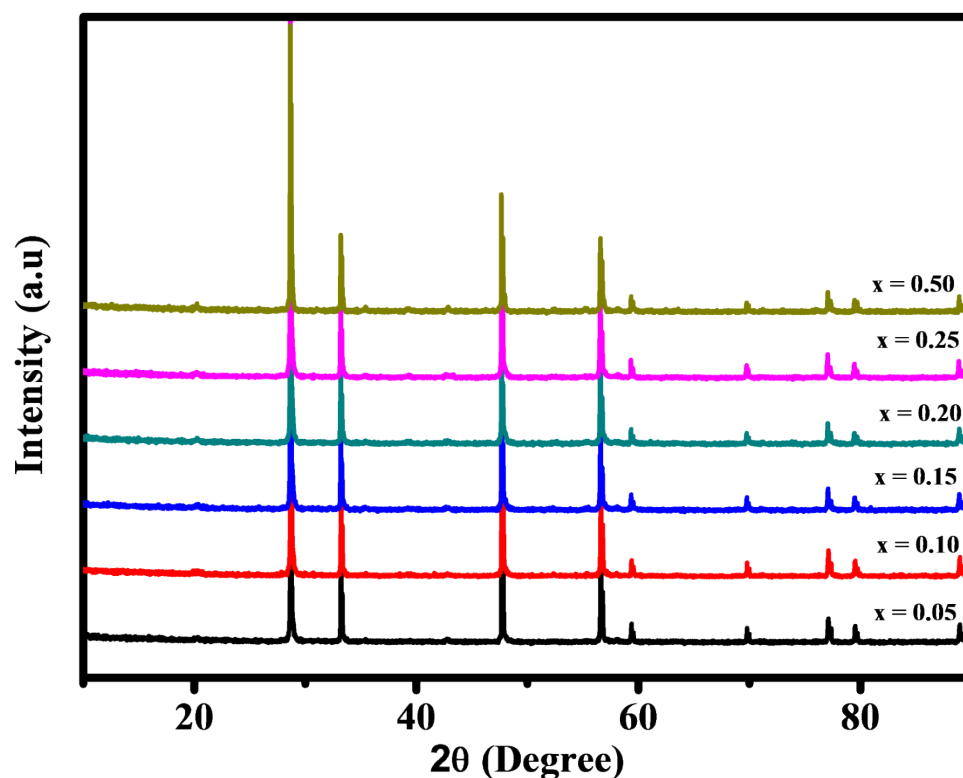

**Fig. S1.** Powder XRD patterns of  $\text{Y}_2\text{Ce}_{1-x}\text{O}_7:x\text{Eu}^{3+}$  ( $x = 0.05, 0.10, 0.15, 0.20, 0.25, 0.50$ ) red phosphors. The XRD patterns can be indexed completely to the C-type structure.

**Fig. S2.**

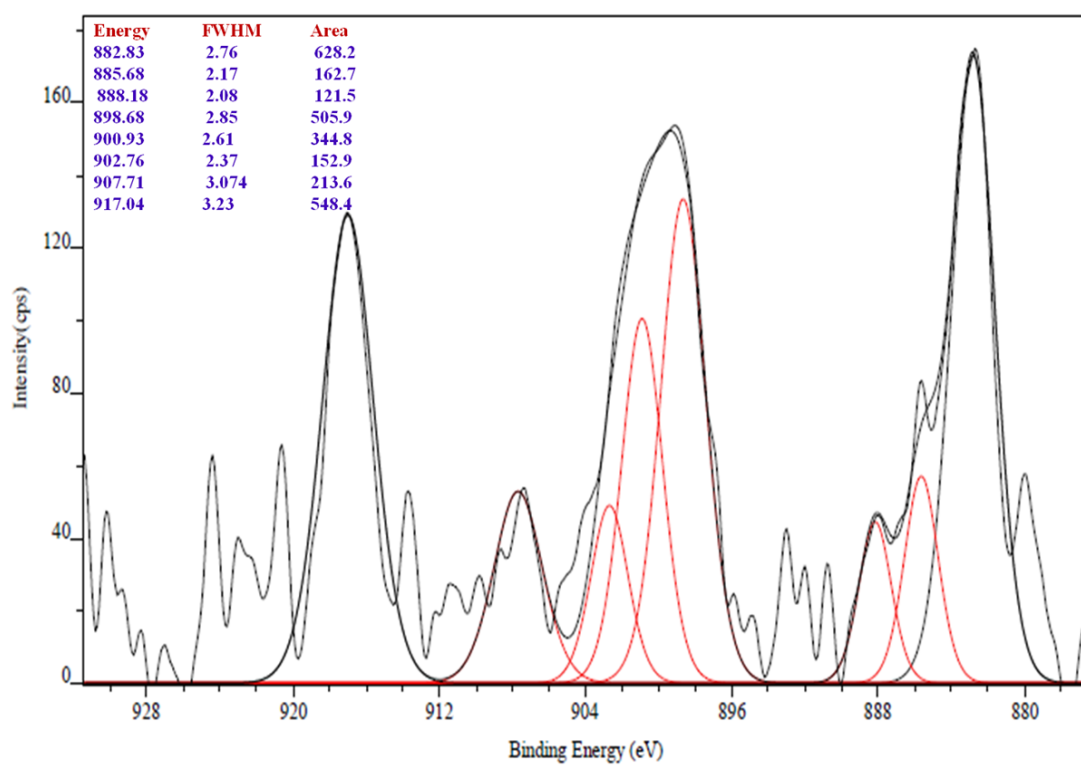

**Fig. S2.** XPS spectra of Ce 3d for Y<sub>2</sub>Ce<sub>1.5</sub>O<sub>7</sub>:0.5Eu<sup>3+</sup> red phosphor and the concentration of Ce<sup>3+</sup> state is decreased compared to the lower substituted one ( $x = 0.10$ ) and is found to be 11.5%.

**Fig. S3.**

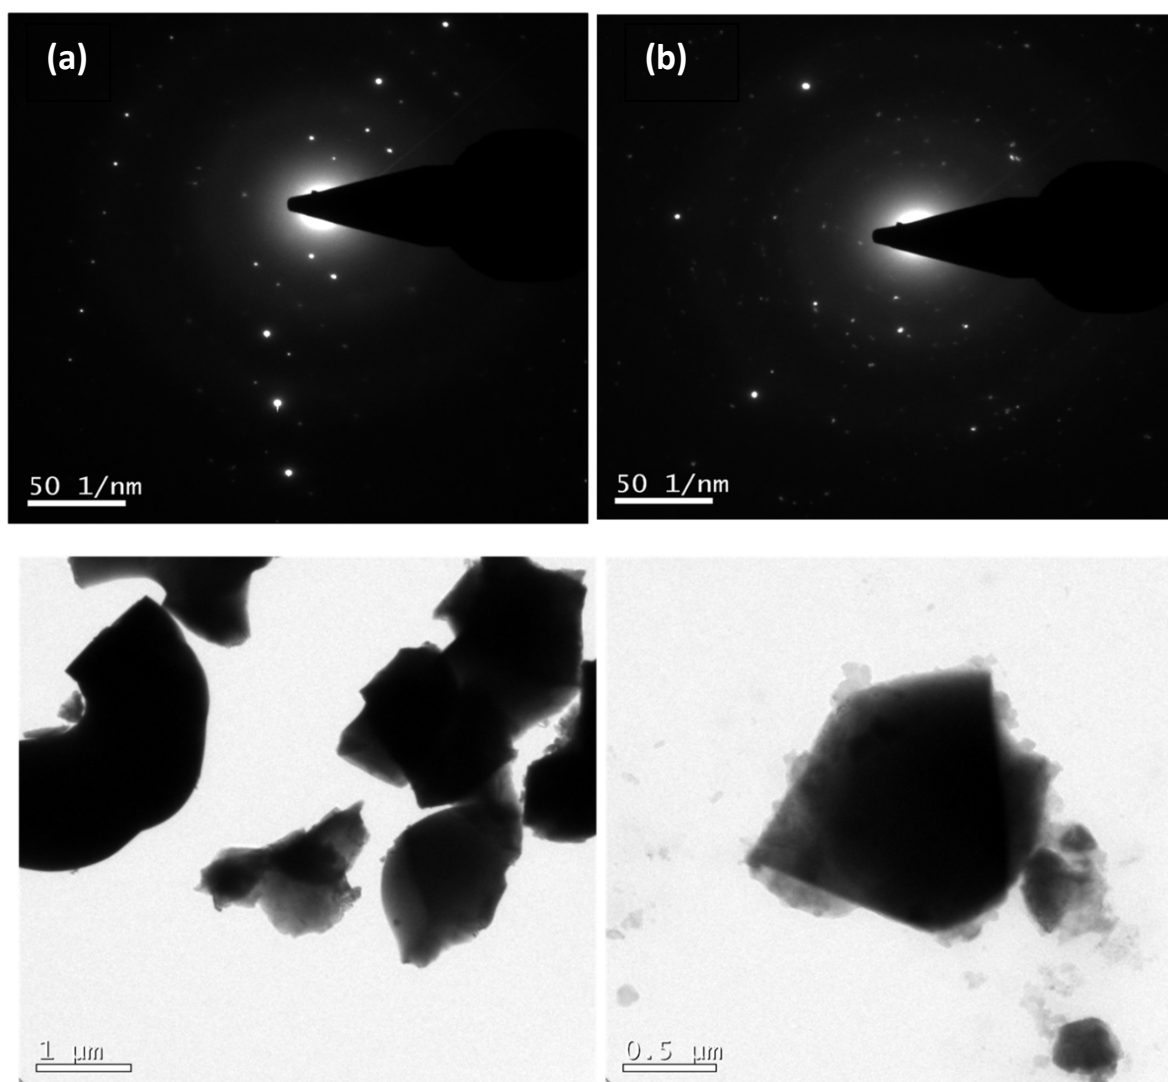

**Fig. S3.** Selected area electron diffraction patterns (SEAD) and TEM micrographs (a)  $\text{Y}_2\text{Ce}_{1.8}\text{O}_{7:0.2}\text{Eu}^{3+}$  and (b)  $\text{Y}_2\text{Ce}_{1.5}\text{O}_{7:0.5}\text{Eu}^{3+}$  red phosphors.

**Fig. S4.**

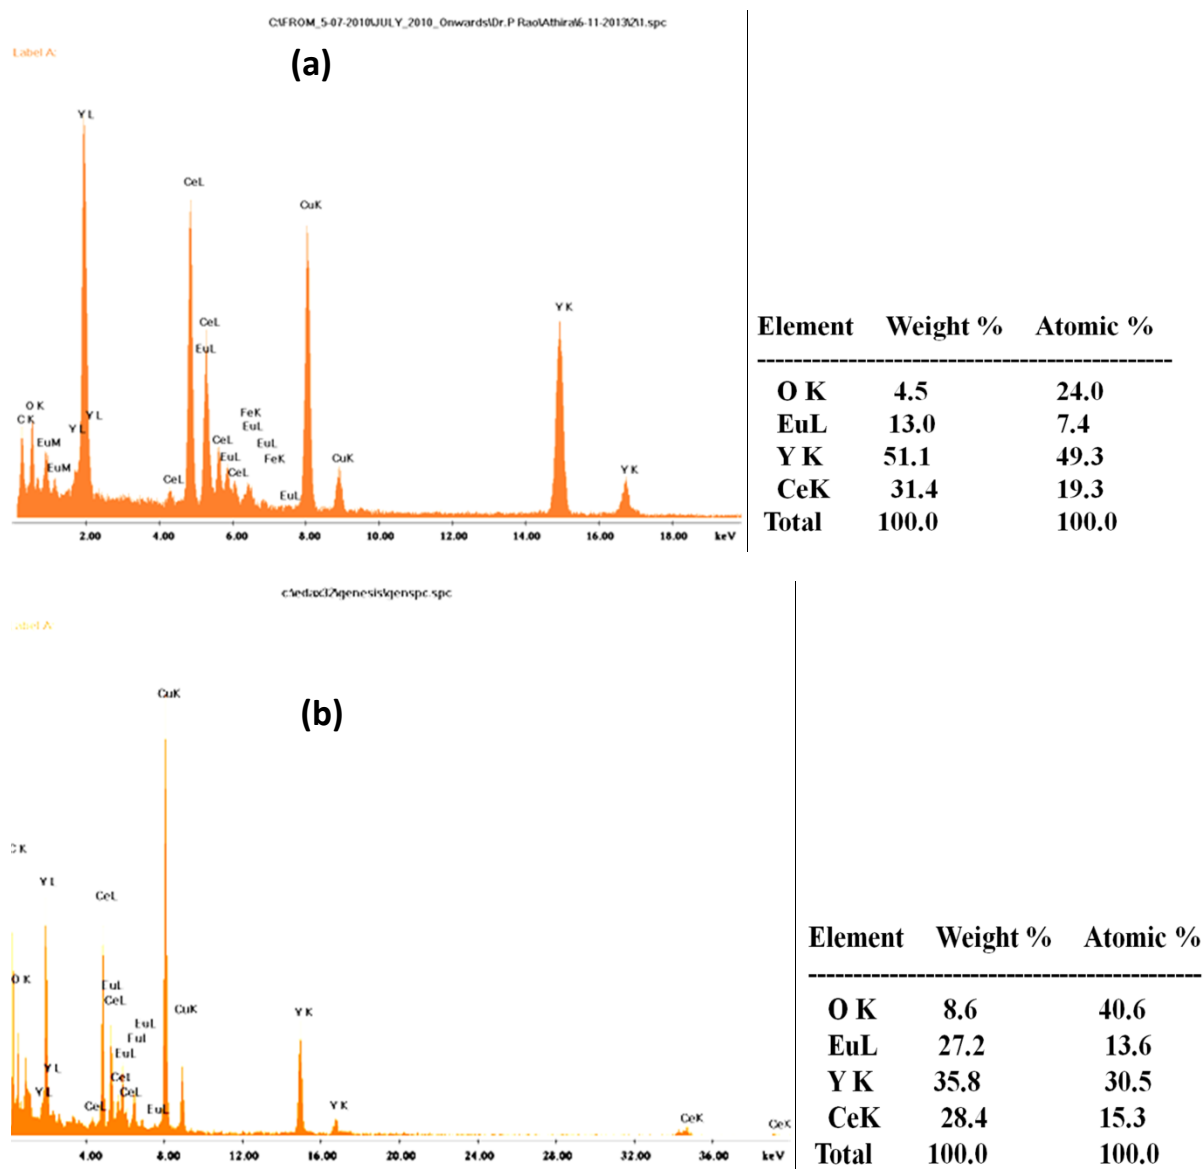

**Fig. S4.** Energy dispersive spectrophotometer (EDS) spectra of (a)  $\text{Y}_2\text{Ce}_{1.8}\text{O}_7:0.2\text{Eu}^{3+}$  and (b)  $\text{Y}_2\text{Ce}_{1.5}\text{O}_7:0.5\text{Eu}^{3+}$  red phosphors.

**Fig. S5.**

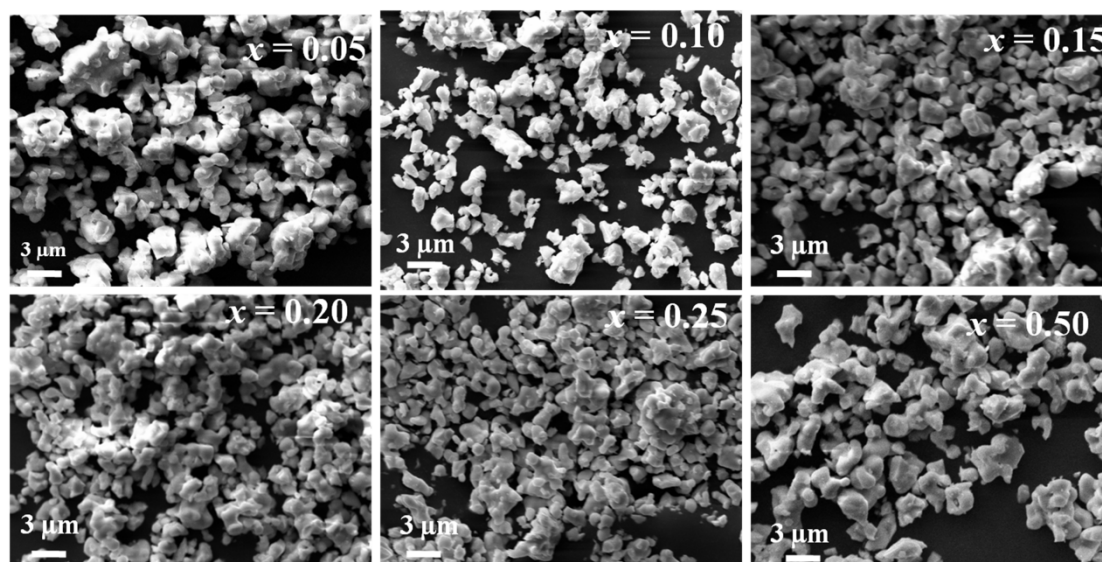

**Fig. S5.** Typical SEM images of  $\text{Y}_2\text{Ce}_{2-x}\text{O}_7:x\text{Eu}^{3+}$  ( $x = 0.05, 0.10, 0.15, 0.20, 0.25$  and  $0.50$ ) red phosphors. The particles are slightly agglomerated and there is a broad distribution of particle size with an average size of 1-3  $\mu\text{m}$ .
